# Supplementary material
Source: Royal Society of Chemistry journal article supplement (doi:10.1039/d6dt01140c)
Supplement: d6dt01140c1.pdf [file d6dt01140c1.pdf]

## Chalcogen Bonding vs. Weakly Coordinating Anions – A Solid State Study on Halidoselenium Cations in an Oxoanionic Environment.

Jan Langwald,<sup>a</sup> Sergi Burguera,<sup>b</sup> Antonio Frontera<sup>\*b</sup> and Mathias S. Wickleder<sup>\*a</sup>

<sup>a</sup> *Institute of Inorganic and Materials Chemistry, University of Cologne, Greinstr. 6, 50939 Cologne, Germany.  
E-mail: mathias.wickleder@uni-koeln.de*

<sup>b</sup> *Universitat de les Illes Balears, Crta de Valldemossa km 7.5, 07122 Palma de Mallorca, Balears, Spain.  
E-mail: toni.frontera@uib.es*

### Table of Contents

|                                                                                                                             |           |
|-----------------------------------------------------------------------------------------------------------------------------|-----------|
| <b>A. Synthesis</b> .....                                                                                                   | <b>1</b>  |
| <b>B. Structure Determination and Crystallographic Details</b> .....                                                        | <b>2</b>  |
| SeOCl <sub>2</sub> .....                                                                                                    | 3         |
| [SeCl <sub>3</sub> ] <sub>2</sub> [S <sub>2</sub> O <sub>7</sub> ] (1) .....                                                | 8         |
| [SeCl <sub>3</sub> ][ClSO <sub>3</sub> ] (2) .....                                                                          | 12        |
| [Se <sub>2</sub> I <sub>4</sub> ] <sub>2</sub> [S <sub>4</sub> O <sub>13</sub> ] <sub>2</sub> ·(SO <sub>3</sub> ) (3) ..... | 17        |
| <b>C. Delta Values</b> .....                                                                                                | <b>23</b> |
| <b>D. Computational Details</b> .....                                                                                       | <b>24</b> |

## A. Synthesis

### General Procedure

SO<sub>3</sub> was obtained in a specially designed apparatus for the generation, distillation and the subsequent transfer into glass ampoules under nitrogen gas. For this purpose, fuming sulfuric acid (5 mL, 65% SO<sub>3</sub>, used as received, Merck, Darmstadt, Germany) was added via a dropping funnel into a 500 mL flask with P<sub>4</sub>O<sub>10</sub> (250 g, >97%, Merck, Darmstadt) with a dosage rate of 1 mL / minute. At the same time, the flask was heated at 130 °C and the generated SO<sub>3</sub> distilled into a connected burette body (scaling 0.01 ml). A connected glass ampoule (*l* = 200 mm,  $\phi$  = 16 mm, thickness of the tube wall = 1.80 mm) containing the solid starting materials was then filled with the required amount of SO<sub>3</sub>.

Selenoyl chloride (SeOCl<sub>2</sub>) was prepared according to literature procedures and its purity confirmed *via* <sup>77</sup>Se NMR spectroscopy ([CDCl<sub>3</sub>]:1496 ppm, s).<sup>[1-2]</sup>

### Synthesis of [SeCl<sub>3</sub>]<sub>2</sub>[S<sub>2</sub>O<sub>7</sub>] (1)

64.3 mg (2.01 mmol, 1.00 eq.) of Sulfur powder (reagent grade, Sigma Aldrich) and 0.20 mL (2.93 mmol, 1.46 eq.) of Selenoyl chloride were filled into a preheated glass ampoule (3.3 borosilicate). 0.20 mL SO<sub>3</sub> (5.00 mmol, 2.49 eq.) were condensed on top and the ampoule was sealed under reduced pressure (1·10<sup>-3</sup> mbar) with a gas burner. The reaction vessel was heated to 80 °C within 24 h, dwelled at this temperature for 48 h and cooled down to room temperature (in the following 'r.t.') within 90 h. After cooling, few colourless crystals could be isolated besides amorphous byproducts.

### Synthesis of [SeCl<sub>3</sub>][ClSO<sub>3</sub>] (3)

65.5 mg (2.04 mmol, 1.00 eq.) of Sulfur powder (reagent grade, Sigma Aldrich) and 0.20 mL (2.93 mmol, 1.46 eq.) of Selenoyl chloride were filled into a preheated glass ampoule (3.3 borosilicate). 0.20 mL SO<sub>3</sub> (5.00 mmol, 2.45 eq.) were condensed on top and the ampoule was sealed under reduced pressure (1·10<sup>-3</sup> mbar) with a gas burner. From the resulting red/orange solid slurry, few colourless crystals could be isolated.

### Synthesis of [Se<sub>2</sub>I<sub>4</sub>]<sub>2</sub>[S<sub>4</sub>O<sub>13</sub>]<sub>2</sub>(SO<sub>3</sub>) (4)

83.4 mg (1.06 mmol, 1.00 eq.) of Selenium powder (99+%, ACROS Organics) and 200.8 mg (0.79 mmol, 0.75 eq.) of Iodine (Riedel-de Haën, Seelze) were filled into a preheated glass ampoule (3.3 borosilicate). 0.20 mL SO<sub>3</sub> (5.00 mmol, 4.73 eq.) were condensed on top and the ampoule was sealed under reduced pressure (1·10<sup>-3</sup> mbar) with a gas burner. The reaction vessel was heated to 80 °C within 24 h, dwelled at this temperature for 48 h and cooled down to r.t. within 90 h. After cooling, few dark red-violet crystals could be isolated from the dark violet mother liquid.

## B. Structure Determination and Crystallographic Details

### General Procedure

The single crystal structure determination was performed on a *Bruker D8 VENTURE KAPPA* diffractometer with a microfocus sealed tube using a multilayer mirror as the monochromator and a *Bruker PHOTON III* detector. As characteristic X-ray radiation  $\text{MoK}_\alpha$  ( $\lambda = 71.073$  pm) or  $\text{AgK}_\alpha$  ( $\lambda = 56.086$  pm) was used for the measurements. Before the measurements, the crystals were prepared in perfluorinated ether oil (Fomblin® YR-180) and selected using a light microscope with equipped polarization filter. A suitable single crystal was fixed on a MiTeGen micromount (150  $\mu\text{m}$  polymer loop) and adjusted to the X-ray beam and cooled down to 100 K in a stream of  $\text{N}_2$ . The images with the intensity data were processed using the software *APEX5*.<sup>[3]</sup> The frames were integrated with the Bruker *SAINT* software package using a narrow frame algorithm. Absorption effects were corrected using *SADABS* for the multi-scan absorption correction.<sup>[4-5]</sup> The structure solution and refinement were done with the software *OLEX2*.<sup>[6]</sup> Dual methods using *SHELXT* were used for structure solution and full-matrix least-squares methods against  $F^2$  using *SHELXL* for the refinement.<sup>[7-8]</sup> All illustrations of the crystal structures were made with the program *Diamond 4* using the .cif as the input file.<sup>[9]</sup>

**SeOCl<sub>2</sub>****Table S1:** Crystallographic data of SeOCl<sub>2</sub>

|                                         |                                                            |
|-----------------------------------------|------------------------------------------------------------|
| Empirical formula                       | Cl <sub>2</sub> OSe                                        |
| Formula weight                          | 165.86 g/mol                                               |
| Temperature                             | 100.00 K                                                   |
| Crystal system                          | monoclinic                                                 |
| Space group                             | P2 <sub>1</sub> /n (No. 14)                                |
| Unit cell dimensions                    | $a = 1961.48(9)$ pm                                        |
|                                         | $b = 438.52(2)$ pm                                         |
|                                         | $c = 2818.9(1)$ pm                                         |
|                                         | $\beta = 98.249(2)^\circ$                                  |
| Volume                                  | 2399.6(2) Å <sup>3</sup>                                   |
| Z                                       | 24                                                         |
| $\rho_{\text{calc}}$                    | 2.755 g/cm <sup>3</sup>                                    |
| $\mu$                                   | 10.500 mm <sup>-1</sup>                                    |
| F(000)                                  | 1824                                                       |
| Crystal size                            | 0.65 × 0.23 × 0.1 mm <sup>3</sup>                          |
| Radiation                               | MoK $\alpha$ ( $\lambda = 0.71073$ nm)                     |
| 2 $\Theta$ range for data collection    | 5.446 to 57.398                                            |
| Index ranges                            | -26 ≤ h ≤ 26, -5 ≤ k ≤ 4, -38 ≤ l ≤ 38                     |
| Reflections collected                   | 39501                                                      |
| Independent reflections                 | 6087 [ $R_{\text{int}} = 0.0335$ , $R_{\sigma} = 0.0228$ ] |
| Completeness                            | 98.1%                                                      |
| Absorption correction                   | multiscan                                                  |
| Min. and max. transmission              | 0.301 / 0.747                                              |
| Data/restraints/parameters              | 6087/0/217                                                 |
| Goodness-of-fit on F <sup>2</sup>       | 1.079                                                      |
| Final R indexes [ $I \geq 2\sigma(I)$ ] | $R_1 = 0.0341$ , $wR_2 = 0.0713$                           |
| Final R indexes [all data]              | $R_1 = 0.0447$ , $wR_2 = 0.0761$                           |
| Largest diff. peak/hole                 | 0.97/-0.68 e · Å <sup>-3</sup>                             |
| CCDC-No.                                | 2516864                                                    |

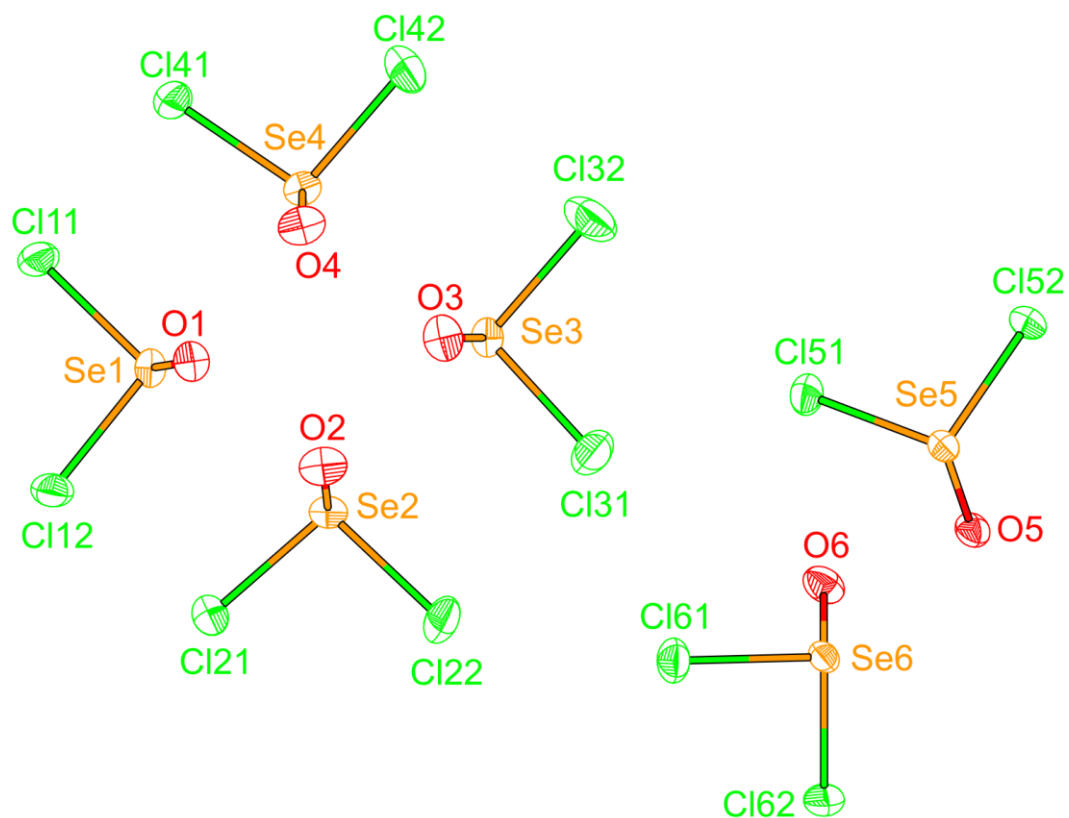

**Figure S1:** Thermal ellipsoid plot of the asymmetric unit of SeOCl<sub>2</sub> shown with 50% probability.

**Table S2:** Fractional Atomic Coordinates ( $\times 10^4$ ) and Equivalent Isotropic Displacement Parameters ( $\text{\AA}^2 \times 10^3$ ) for  $\text{SeOCl}_2$ .  $U_{\text{eq}}$  is defined as 1/3 of the trace of the orthogonalised  $U_{ij}$  tensor.

| Atom | <i>x</i>   | <i>y</i>  | <i>z</i>   | $U(\text{eq})$ |
|------|------------|-----------|------------|----------------|
| Se1  | 1369.6(2)  | 2326.2(8) | 5493.3(2)  | 20.01(9)       |
| Cl11 | 707.8(6)   | 2317(3)   | 4808.2(4)  | 36.0(3)        |
| Cl12 | 535.8(6)   | 2442(3)   | 5926.6(4)  | 35.0(2)        |
| O1   | 1681.3(14) | 5745(6)   | 5538.5(10) | 23.4(6)        |
| Se2  | 2476.2(2)  | 7360.4(8) | 6468.6(2)  | 20.84(9)       |
| Cl21 | 1522.9(6)  | 7313(3)   | 6778.4(4)  | 35.6(2)        |
| Cl22 | 3151.0(6)  | 7592(4)   | 7150.2(4)  | 46.0(3)        |
| O2   | 2507.0(17) | 10766(6)  | 6257.8(11) | 29.4(7)        |
| Se3  | 3779.2(2)  | 2372.3(8) | 5856.9(2)  | 21.51(9)       |
| Cl31 | 4385.5(7)  | 2318(3)   | 6562.1(4)  | 41.8(3)        |
| Cl32 | 4644.8(7)  | 2472(4)   | 5451.5(5)  | 52.8(4)        |
| O3   | 3481.5(15) | 5810(7)   | 5807.5(12) | 29.8(7)        |
| Se4  | 2671.3(2)  | 7316.1(8) | 4893.5(2)  | 20.92(9)       |
| Cl41 | 1861.1(6)  | 7165(3)   | 4278.1(4)  | 32.7(2)        |
| Cl42 | 3534.5(6)  | 7406(3)   | 4484.0(5)  | 45.6(3)        |
| O4   | 2638.6(17) | 10779(6)  | 5083.5(10) | 28.6(6)        |
| Se5  | 6853.3(2)  | -662.3(9) | 7048.4(2)  | 20.28(9)       |
| Cl51 | 5942.8(5)  | -2396(3)  | 6588.2(4)  | 34.4(2)        |
| Cl52 | 7584.5(5)  | -2297(3)  | 6581.9(4)  | 30.0(2)        |
| O5   | 6949.2(14) | -3108(7)  | 7478.7(10) | 24.9(6)        |
| Se6  | 5788.0(2)  | 4551.2(9) | 7889.5(2)  | 20.87(9)       |
| Cl61 | 4730.2(5)  | 6090(3)   | 7686.4(4)  | 34.2(2)        |
| Cl62 | 5611.7(6)  | 2295(3)   | 8557.9(4)  | 33.8(2)        |
| O6   | 5858.5(16) | 1761(7)   | 7536.1(11) | 30.9(7)        |

**Table S3:** Anisotropic Displacement Parameters ( $\text{\AA}^2 \times 10^3$ ) for  $\text{SeOCl}_2$ . The anisotropic displacement factor exponent takes the form:  $-2\pi^2[h^2a^*U_{11}+2hka^*b^*U_{12}+\dots]$ .

| Atom | $U_{11}$  | $U_{22}$  | $U_{33}$  | $U_{23}$  | $U_{13}$ | $U_{12}$  |
|------|-----------|-----------|-----------|-----------|----------|-----------|
| Se1  | 19.46(17) | 11.19(16) | 28.6(2)   | -0.64(14) | 0.67(15) | -0.88(14) |
| Cl11 | 35.1(6)   | 51.1(7)   | 21.5(5)   | -4.3(5)   | 2.4(4)   | -13.7(5)  |
| Cl12 | 35.4(5)   | 46.7(7)   | 24.4(5)   | -2.3(5)   | 9.1(4)   | -12.5(5)  |
| O1   | 25.4(14)  | 12.9(12)  | 31.8(15)  | -1.1(11)  | 3.4(12)  | -2.9(11)  |
| Se2  | 29.3(2)   | 12.54(17) | 21.38(18) | 0.89(14)  | 6.00(15) | 2.84(15)  |
| Cl21 | 25.6(5)   | 47.6(7)   | 34.2(5)   | -2.8(5)   | 6.1(4)   | -0.9(5)   |
| Cl22 | 30.7(6)   | 66.2(9)   | 37.3(6)   | 12.1(6)   | -8.4(5)  | 1.9(6)    |
| O2   | 46.2(18)  | 12.6(13)  | 29.7(15)  | 2.0(11)   | 7.2(13)  | 1.3(13)   |
| Se3  | 21.08(18) | 12.63(17) | 30.2(2)   | -1.98(15) | 1.56(15) | 1.18(14)  |
| Cl31 | 39.6(6)   | 49.8(7)   | 32.5(6)   | -1.7(5)   | -6.4(5)  | 4.6(6)    |
| Cl32 | 48.5(7)   | 62.4(9)   | 54.1(8)   | 6.8(7)    | 29.5(6)  | 16.1(7)   |
| O3   | 31.0(16)  | 14.8(14)  | 43.6(18)  | 0.5(13)   | 5.3(13)  | 4.1(12)   |
| Se4  | 28.7(2)   | 11.93(17) | 21.96(18) | -1.14(14) | 2.93(15) | 0.24(15)  |
| Cl41 | 30.4(5)   | 40.5(6)   | 26.4(5)   | -2.3(4)   | 1.5(4)   | -6.0(5)   |
| Cl42 | 29.9(6)   | 58.3(8)   | 51.2(7)   | -2.9(6)   | 14.6(5)  | 2.8(6)    |
| O4   | 45.3(18)  | 11.5(13)  | 28.8(15)  | -4.4(11)  | 4.7(13)  | -1.5(12)  |
| Se5  | 19.10(18) | 20.62(18) | 21.92(18) | 0.94(15)  | 5.68(14) | 0.90(15)  |
| Cl51 | 22.5(5)   | 47.2(7)   | 32.3(5)   | -7.5(5)   | -0.6(4)  | -1.7(5)   |
| Cl52 | 25.2(5)   | 41.3(6)   | 25.3(5)   | -4.3(4)   | 9.8(4)   | 2.7(4)    |
| O5   | 23.3(14)  | 26.1(14)  | 26.2(14)  | 6.5(12)   | 7.0(11)  | -0.6(12)  |
| Se6  | 17.66(17) | 24.04(19) | 21.81(18) | -1.68(15) | 5.89(14) | -1.92(15) |
| Cl61 | 21.9(5)   | 40.0(6)   | 39.3(6)   | 5.2(5)    | 0.0(4)   | 3.8(4)    |
| Cl62 | 33.3(5)   | 46.5(7)   | 22.5(5)   | 8.1(5)    | 7.1(4)   | 2.3(5)    |
| O6   | 31.4(16)  | 31.1(16)  | 32.8(16)  | -8.8(13)  | 12.6(13) | -3.3(13)  |

**Table S4:** Bond Lengths for SeOCl<sub>2</sub> in pm.

| Atom | Atom | Length/pm | Atom | Atom | Length/pm |
|------|------|-----------|------|------|-----------|
| Se1  | Cl11 | 216.7(1)  | Se4  | Cl41 | 217.9(1)  |
| Se1  | Cl12 | 217.77(1) | Se4  | Cl42 | 218.2(1)  |
| Se1  | O1   | 167(3)    | Se4  | O4   | 161.4(3)  |
| Se2  | Cl21 | 217.4(1)  | Se5  | Cl51 | 218.8(1)  |
| Se2  | Cl22 | 217.34(1) | Se5  | Cl52 | 220.0(1)  |
| Se2  | O2   | 161.2(3)  | Se5  | O5   | 161.0(3)  |
| Se3  | Cl31 | 216.5(1)  | Se6  | Cl61 | 217.9(1)  |
| Se3  | Cl32 | 217.9(1)  | Se6  | Cl62 | 219.9(1)  |
| Se3  | O3   | 161.6(3)  | Se6  | O6   | 159.6(3)  |

**Table S5:** Bond Angles for SeOCl<sub>2</sub>.

| Atom | Atom | Atom | Angle/°  | Atom | Atom | Atom | Angle/°  |
|------|------|------|----------|------|------|------|----------|
| Cl11 | Se1  | Cl12 | 95.61(4) | Cl41 | Se4  | Cl42 | 96.43(5) |
| O1   | Se1  | Cl11 | 104.1(1) | O4   | Se4  | Cl41 | 103.5(1) |
| O1   | Se1  | Cl12 | 103.9(1) | O4   | Se4  | Cl42 | 103.3(1) |
| Cl22 | Se2  | Cl21 | 95.46(5) | Cl51 | Se5  | Cl52 | 94.54(4) |
| O2   | Se2  | Cl21 | 103.7(1) | O5   | Se5  | Cl51 | 102.3(1) |
| O2   | Se2  | Cl22 | 103.4(1) | O5   | Se5  | Cl52 | 102.6(1) |
| Cl31 | Se3  | Cl32 | 96.61(6) | Cl61 | Se6  | Cl62 | 95.94(5) |
| O3   | Se3  | Cl31 | 103.5(1) | O6   | Se6  | Cl61 | 103.8(1) |
| O3   | Se3  | Cl32 | 103.6(1) | O6   | Se6  | Cl62 | 103.2(1) |
| Cl11 | Se1  | Cl12 | 95.61(4) | Cl41 | Se4  | Cl42 | 96.43(5) |
| O1   | Se1  | Cl11 | 104.1(1) | O4   | Se4  | Cl41 | 103.5(1) |

**[SeCl<sub>3</sub>]<sub>2</sub>[S<sub>2</sub>O<sub>7</sub>] (1)****Table S6:** Crystallographic data of [SeCl<sub>3</sub>]<sub>2</sub>[S<sub>2</sub>O<sub>7</sub>].

|                                         |                                                               |
|-----------------------------------------|---------------------------------------------------------------|
| Empirical formula                       | Cl <sub>6</sub> O <sub>7</sub> S <sub>2</sub> Se <sub>2</sub> |
| Formula weight                          | 546.762 g/mol                                                 |
| Temperature                             | 100.00 K                                                      |
| Crystal system                          | monoclinic                                                    |
| Space group                             | C2/c (No. 15)                                                 |
| Unit cell dimensions                    | $a = 1200.88(4)$ pm                                           |
|                                         | $b = 1830.82(7)$ pm                                           |
|                                         | $c = 890.12(3)$ pm                                            |
|                                         | $\beta = 132.218(1)^\circ$                                    |
| Volume                                  | 1449.35(9) Å <sup>3</sup>                                     |
| Z                                       | 4                                                             |
| $\rho_{\text{calc}}$                    | 2.506 g/cm <sup>3</sup>                                       |
| $\mu$                                   | 6.507 mm <sup>-1</sup>                                        |
| F(000)                                  | 1037                                                          |
| Crystal size                            | 0.33 × 0.09 × 0.07 mm <sup>3</sup>                            |
| Radiation                               | MoK $\alpha$ ( $\lambda = 0.71073$ nm)                        |
| 2 $\Theta$ range for data collection    | 4.44 to 61.06                                                 |
| Index ranges                            | -17 ≤ h ≤ 16, -26 ≤ k ≤ 25, -12 ≤ l ≤ 12                      |
| Reflections collected                   | 28440                                                         |
| Independent reflections                 | 2212 [ $R_{\text{int}} = 0.0577$ , $R_{\sigma} = 0.0219$ ]    |
| Completeness                            | 99.6%                                                         |
| Absorption correction                   | multiscan                                                     |
| Min. and max. transmission              | 0.496 / 0.746                                                 |
| Data/restraints/parameters              | 2212/0/78                                                     |
| Goodness-of-fit on F <sup>2</sup>       | 1.007                                                         |
| Final R indexes [ $I \geq 2\sigma(I)$ ] | $R_1 = 0.0156$ , $wR_2 = 0.0318$                              |
| Final R indexes [all data]              | $R_1 = 0.0214$ , $wR_2 = 0.0331$                              |
| Largest diff. peak/hole                 | 0.57/-0.69 e · Å <sup>-3</sup>                                |
| CCDC-No.                                | 2492705                                                       |

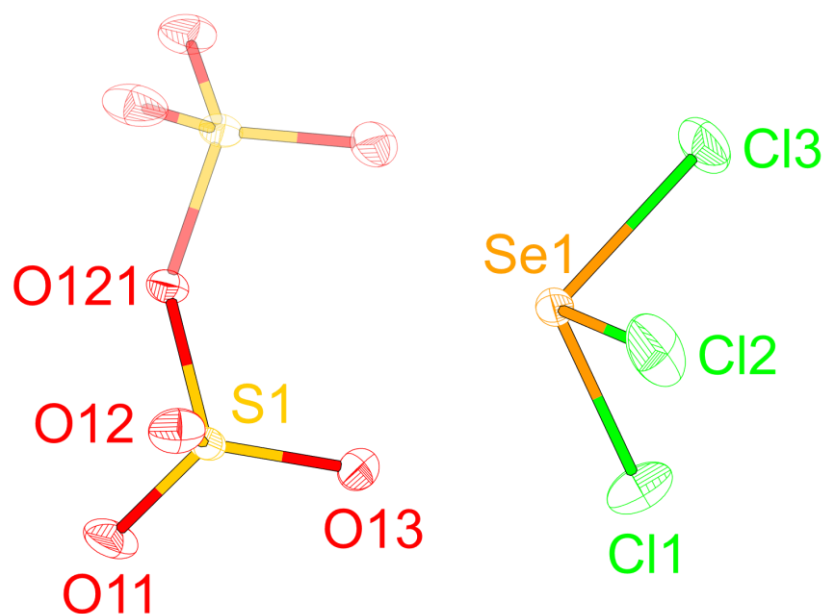

**Figure S2:** Thermal ellipsoid plot of the asymmetric unit of  $[\text{SeCl}_3]_2[\text{S}_2\text{O}_7]$  shown with 50% probability. Atoms that are generated by symmetry operation for complete representation of the anion are shown at 50% visibility.

**Table S7:** Fractional Atomic Coordinates ( $\times 10^4$ ) and Equivalent Isotropic Displacement Parameters ( $\text{\AA}^2 \times 10^3$ ) for  $[\text{SeCl}_3]_2[\text{S}_2\text{O}_7]$ .  $U_{\text{eq}}$  is defined as 1/3 of the trace of the orthogonalised  $U_{ij}$  tensor.

| Atom | <i>x</i>    | <i>y</i>    | <i>z</i>    | $U_{\text{eq}}$ |
|------|-------------|-------------|-------------|-----------------|
| Se1  | 7519.10(11) | 3708.35(6)  | 7367.43(17) | 15.24(4)        |
| S1   | 3844.4(3)   | 3241.35(15) | 2592.1(4)   | 12.87(6)        |
| Cl3  | 9906.5(3)   | 3823.5(2)   | 9445.5(6)   | 31.96(9)        |
| Cl2  | 7002.9(4)   | 4839.23(19) | 7015.6(7)   | 39.82(10)       |
| Cl1  | 7275.5(5)   | 3472.4(3)   | 9467.5(6)   | 42.54(10)       |
| O121 | 5000        | 2822.1(6)   | 2500        | 13.8(2)         |
| O12  | 3095.5(10)  | 3796.5(4)   | 1042.1(14)  | 20.72(19)       |
| O11  | 2887.9(9)   | 2654.5(5)   | 2194.3(14)  | 21.72(19)       |
| O13  | 4754.2(10)  | 3539.1(6)   | 4610.8(14)  | 26.0(2)         |

**Table S8:** Anisotropic Displacement Parameters ( $\text{\AA}^2 \times 10^3$ ) for  $[\text{SeCl}_3]_2[\text{S}_2\text{O}_7]$ . The anisotropic displacement factor exponent takes the form:  $-2\pi^2[h^2a^*U_{11}+2hka^*b^*U_{12}+\dots]$ .

| Atom | U <sub>11</sub> | U <sub>22</sub> | U <sub>33</sub> | U <sub>23</sub> | U <sub>13</sub> | U <sub>12</sub> |
|------|-----------------|-----------------|-----------------|-----------------|-----------------|-----------------|
| Se1  | 11.82(6)        | 15.89(7)        | 17.12(6)        | -0.15(4)        | 9.36(5)         | -4.08(4)        |
| S1   | 11.35(11)       | 12.63(13)       | 16.38(13)       | -1.65(9)        | 10.03(11)       | -2.18(10)       |
| Cl3  | 12.43(12)       | 40.2(2)         | 30.58(17)       | -2.08(13)       | 9.26(13)        | -8.66(15)       |
| Cl2  | 28.07(16)       | 16.66(17)       | 59.7(3)         | -1.00(13)       | 23.32(17)       | -13.71(16)      |
| Cl1  | 49.3(2)         | 61.4(3)         | 39.1(2)         | -8.0(2)         | 38.7(2)         | -10.66(19)      |
| O121 | 11.6(5)         | 14.5(5)         | 17.0(6)         | 0               | 10.3(5)         | 0               |
| O12  | 22.8(4)         | 15.9(4)         | 28.2(5)         | 5.5(3)          | 19.1(4)         | 4.5(3)          |
| O11  | 20.3(4)         | 16.9(4)         | 34.6(5)         | -4.8(3)         | 21.2(4)         | -1.8(4)         |
| O13  | 16.8(4)         | 41.3(6)         | 21.2(5)         | -4.9(4)         | 13.2(4)         | -13.0(4)        |

**Table S9:** Bond Lengths for  $[\text{SeCl}_3]_2[\text{S}_2\text{O}_7]$  in pm.

| Atom | Atom | Length/pm | Atom | Atom | Length/pm |
|------|------|-----------|------|------|-----------|
| Se1  | Cl3  | 213.50(3) | S1   | O12  | 144.14(9) |
| Se1  | Cl2  | 212.33(4) | S1   | O11  | 143.27(8) |
| Se1  | Cl1  | 212.17(4) | S1   | O13  | 144.27(9) |
| S1   | O121 | 163.54(6) |      |      |           |

**Table S10:** Bond Angles for  $[\text{SeCl}_3]_2[\text{S}_2\text{O}_7]$ .

| Atom | Atom | Atom | Angle/°   | Atom            | Atom | Atom | Angle/°   |
|------|------|------|-----------|-----------------|------|------|-----------|
| Cl2  | Se1  | Cl3  | 96.92(2)  | O11             | S1   | O12  | 114.28(5) |
| Cl1  | Se1  | Cl3  | 99.01(2)  | O13             | S1   | O121 | 106.37(4) |
| Cl1  | Se1  | Cl2  | 97.41(2)  | O13             | S1   | O12  | 112.89(6) |
| O12  | S1   | O121 | 106.72(4) | O13             | S1   | O11  | 113.68(6) |
| O11  | S1   | O121 | 101.66(5) | S1 <sup>1</sup> | O121 | S1   | 124.02(7) |

<sup>1</sup>1-X, +Y, 1/2-Z

**Table S11:** Torsion Angles for  $[\text{SeCl}_3]_2[\text{S}_2\text{O}_7]$ .

| A  | B    | C               | D                | Angle/°   | A   | B  | C    | D               | Angle/°   |
|----|------|-----------------|------------------|-----------|-----|----|------|-----------------|-----------|
| S1 | O121 | S1 <sup>1</sup> | O12 <sup>1</sup> | 47.62(4)  | O12 | S1 | O121 | S1 <sup>1</sup> | 47.62(5)  |
| S1 | O121 | S1 <sup>1</sup> | O11 <sup>1</sup> | 167.64(4) | O11 | S1 | O121 | S1 <sup>1</sup> | 167.64(4) |
| S1 | O121 | S1 <sup>1</sup> | O13 <sup>1</sup> | -73.15(5) | O13 | S1 | O121 | S1 <sup>1</sup> | -73.15(5) |

<sup>1</sup>1-X, +Y, 1/2-Z

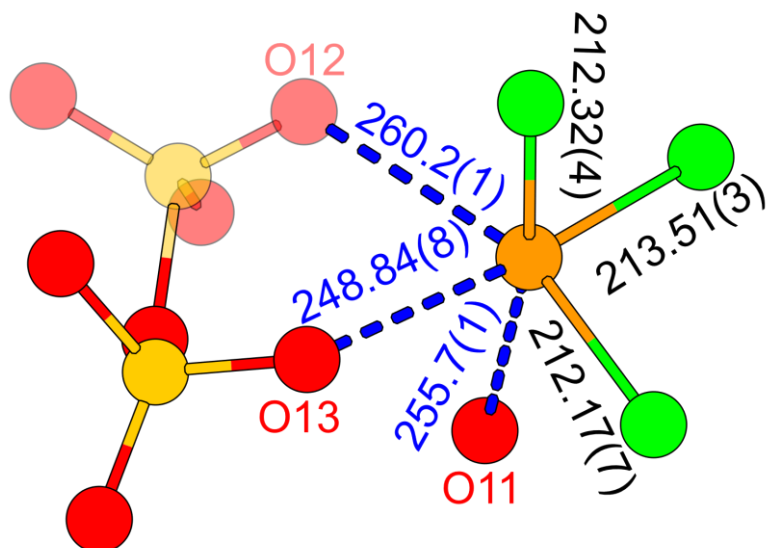

**Figure S 3:** Chalcogen-bonding within  $[\text{SeCl}_3]_2[\text{S}_2\text{O}_7]$  and bond lengths of the opposite Se–Cl bonds. Distances are given in pm. Atoms that are generated by symmetry operation for complete representation of the anion are shown at 50% visibility.

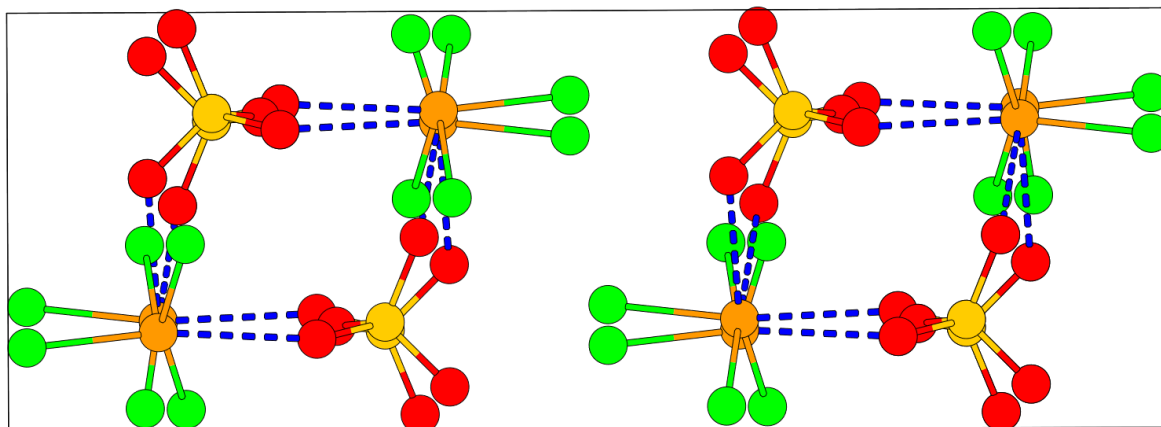

**Figure S 4:** Filled unit cell of  $[\text{SeCl}_3]_2[\text{S}_2\text{O}_7]$ , viewed along the crystallographic *a*-axis. Chalcogen-bonding within the units shown as dotted blue lines.

**[SeCl<sub>3</sub>][ClSO<sub>3</sub>] (2)****Table S12:** Crystallographic data of [SeCl<sub>3</sub>][ClSO<sub>3</sub>].

|                                                              |                                                                                                 |
|--------------------------------------------------------------|-------------------------------------------------------------------------------------------------|
| Empirical formula                                            | Cl <sub>4</sub> O <sub>3</sub> SSe                                                              |
| Formula weight                                               | 300.82 g/mol                                                                                    |
| Temperature                                                  | 100.00 K                                                                                        |
| Crystal system                                               | Triclinic                                                                                       |
| Space group                                                  | <i>P</i> $\bar{1}$ (No. 2)                                                                      |
| Unit cell dimensions                                         | <i>a</i> = 919.60(4) pm                                                                         |
|                                                              | <i>b</i> = 958.99(3) pm                                                                         |
|                                                              | <i>c</i> = 1879.26(2) pm                                                                        |
|                                                              | $\alpha$ = 97.718(2) $^\circ$<br>$\beta$ = 100.660(2) $^\circ$<br>$\gamma$ = 97.718(2) $^\circ$ |
| Volume                                                       | 1566.32(11) Å <sup>3</sup>                                                                      |
| <i>Z</i>                                                     | 8                                                                                               |
| $\rho_{\text{calc}}$                                         | 2.551 g/cm <sup>3</sup>                                                                         |
| $\mu$                                                        | 6.360 mm <sup>-1</sup>                                                                          |
| F(000)                                                       | 1136                                                                                            |
| Crystal size                                                 | 0.21 × 0.03 × 0.02 mm <sup>3</sup>                                                              |
| Radiation                                                    | MoK $\alpha$ ( $\lambda$ = 0.71073 nm)                                                          |
| 2 $\Theta$ range for data collection                         | 4.454 to 57.398                                                                                 |
| Index ranges                                                 | -12 ≤ <i>h</i> ≤ 12, -11 ≤ <i>k</i> ≤ 12, -25 ≤ <i>l</i> ≤ 25                                   |
| Reflections collected                                        | 36329                                                                                           |
| Independent reflections                                      | 8070 [ <i>R</i> <sub>int</sub> = 0.0537, <i>R</i> <sub><math>\sigma</math></sub> = 0.0489]      |
| Completeness                                                 | 99.9%                                                                                           |
| Absorption correction                                        | multiscan                                                                                       |
| Min. and max. transmission                                   | 0.449 / 0.746                                                                                   |
| Data/restraints/parameters                                   | 8070/0/325                                                                                      |
| Goodness-of-fit on F <sup>2</sup>                            | 1.060                                                                                           |
| Final <i>R</i> indexes [ <i>I</i> ≥ 2 $\sigma$ ( <i>I</i> )] | <i>R</i> <sub>1</sub> = 0.0404, <i>wR</i> <sub>2</sub> = 0.874                                  |
| Final <i>R</i> indexes [all data]                            | <i>R</i> <sub>1</sub> = 0.0541, <i>wR</i> <sub>2</sub> = 0.935                                  |
| Largest diff. peak/hole                                      | 0.94/-0.89 e · Å <sup>-3</sup>                                                                  |
| CCDC-No.                                                     | 2499372                                                                                         |

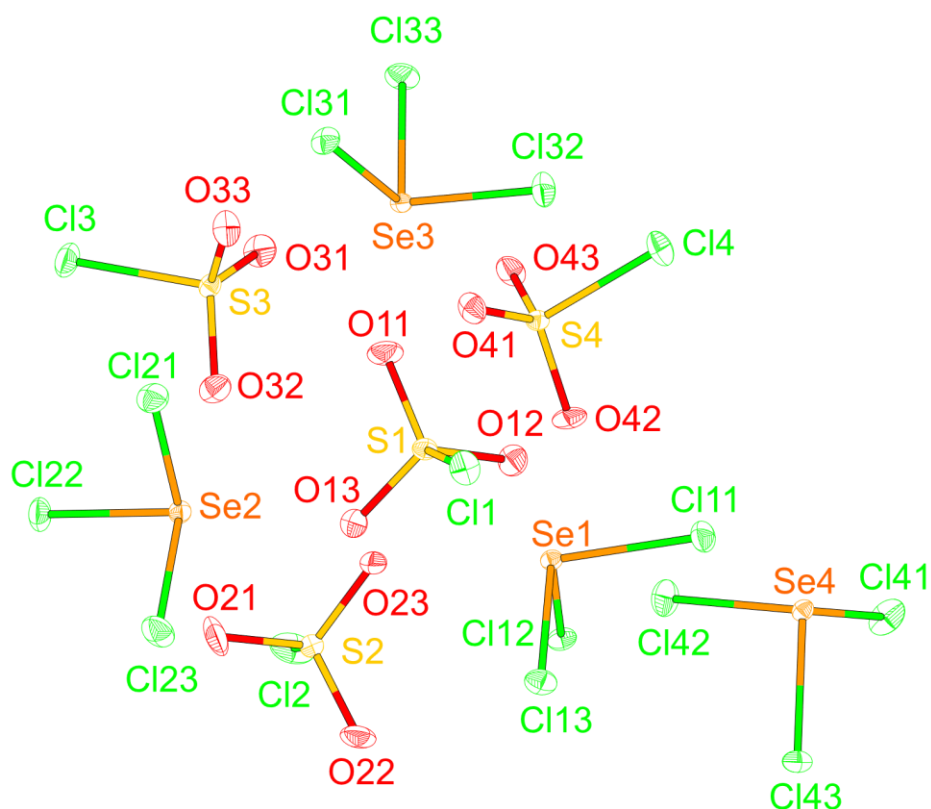

**Figure S5:** Thermal ellipsoid plot of the asymmetric unit  $[\text{SeCl}_3][\text{ClSO}_3]$  shown with 50% probability.

**Table S13:** Fractional Atomic Coordinates ( $\times 10^4$ ) and Equivalent Isotropic Displacement Parameters ( $\text{\AA}^2 \times 10^3$ ) for  $[\text{SeCl}_3][\text{ClSO}_3]$ .  $U_{\text{eq}}$  is defined as  $1/3$  of the trace of the orthogonalised  $U_{ij}$  tensor.

| Atom | <i>x</i>    | <i>y</i>    | <i>z</i>  | $U_{\text{eq}}$ |
|------|-------------|-------------|-----------|-----------------|
| Se1  | 1582.9(5)   | 1109.9(4)   | 3775.3(2) | 8.74(9)         |
| Cl11 | 3797.3(12)  | 1602.4(12)  | 4435.6(6) | 17.3(2)         |
| Cl12 | 369.5(12)   | 1509.6(11)  | 4647.6(6) | 12.4(2)         |
| Cl13 | 1792.3(13)  | 3201.1(11)  | 3507.2(6) | 15.9(2)         |
| Se2  | -2080.0(5)  | -578.0(5)   | 1077.8(2) | 11.14(10)       |
| Cl21 | -1222.5(14) | -1690.6(13) | 196.6(6)  | 18.9(2)         |
| Cl22 | -4413.5(12) | -1519.9(13) | 641.0(6)  | 18.5(2)         |
| Cl23 | -1988.3(14) | 1439.7(13)  | 736.1(7)  | 22.1(2)         |
| Se3  | 1798.3(5)   | -3746.1(4)  | 1649.6(2) | 8.82(9)         |
| Cl31 | 2002.0(13)  | -4281.3(12) | 522.4(6)  | 14.6(2)         |
| Cl32 | 4136.9(12)  | -2978.1(13) | 2114.8(6) | 18.1(2)         |
| Cl33 | 1507.3(14)  | -5915.6(12) | 1835.0(7) | 19.7(2)         |
| Se4  | 7602.1(5)   | 4862.2(4)   | 3450.5(2) | 9.31(9)         |
| Cl41 | 7603.4(15)  | 4637.1(13)  | 4561.5(6) | 21.7(3)         |
| Cl42 | 5322.1(13)  | 3716.5(13)  | 3011.4(7) | 22.6(2)         |

|      |             |             |            |         |
|------|-------------|-------------|------------|---------|
| Cl43 | 7261.6(13)  | 7027.8(12)  | 3586.8(6)  | 17.0(2) |
| Cl1  | 3668.8(13)  | 1384.3(13)  | 1361.7(6)  | 18.3(2) |
| S1   | 2060.8(12)  | 189.1(11)   | 1806.6(6)  | 11.6(2) |
| O11  | 1871(4)     | -1281(3)    | 1394.8(19) | 21.0(7) |
| O12  | 2724(4)     | 455(4)      | 2568.9(17) | 18.3(7) |
| O13  | 755(4)      | 776(4)      | 1660.7(18) | 17.9(7) |
| Cl2  | -3659.3(15) | 73.4(14)    | 3525.1(8)  | 26.3(3) |
| S2   | -2201.4(12) | 916.8(12)   | 2898.6(6)  | 12.5(2) |
| O21  | -3098(4)    | 554(5)      | 2171.8(19) | 27.7(9) |
| O22  | -1746(4)    | 2456(3)     | 3236(2)    | 21.8(8) |
| O23  | -978(4)     | 179(3)      | 2969.5(18) | 15.6(7) |
| Cl3  | -4185.7(13) | -5461.0(13) | 858.5(6)   | 20.2(2) |
| S3   | -2186.3(12) | -4310.4(11) | 1534.9(6)  | 10.3(2) |
| O31  | -2114(4)    | -5007(4)    | 2150.8(17) | 19.0(7) |
| O32  | -2346(4)    | -2824(3)    | 1702.0(18) | 18.0(7) |
| O33  | -1075(4)    | -4540(4)    | 1079.4(17) | 16.8(7) |
| Cl4  | 3550.9(12)  | -2903.9(13) | 4014.1(6)  | 19.1(2) |
| S4   | 1374.6(12)  | -2721.9(11) | 3711.7(6)  | 9.7(2)  |
| O41  | 1226(4)     | -2753(4)    | 2938.0(17) | 17.5(7) |
| O42  | 1333(4)     | -1347(3)    | 4161.1(17) | 16.1(7) |
| O43  | 477(4)      | -3979(3)    | 3902.0(19) | 17.9(7) |

**Table S14:** Anisotropic Displacement Parameters ( $\text{\AA}^2 \times 10^3$ ) for  $[\text{SeCl}_3][\text{ClSO}_3]$ . The anisotropic displacement factor exponent takes the form:  $-2\pi^2[h^2a^2U_{11}+2hka*b*U_{12}+\dots]$ .

| Atom | $U_{11}$ | $U_{22}$ | $U_{33}$ | $U_{23}$ | $U_{13}$ | $U_{12}$ |
|------|----------|----------|----------|----------|----------|----------|
| Se1  | 10.2(2)  | 7.62(19) | 8.5(2)   | 2.12(15) | 2.21(15) | 1.93(16) |
| Cl11 | 11.4(5)  | 19.3(5)  | 19.9(6)  | 4.0(4)   | -0.3(4)  | 2.9(4)   |
| Cl12 | 15.9(5)  | 11.2(5)  | 11.3(5)  | 1.6(4)   | 6.2(4)   | 3.8(4)   |
| Cl13 | 18.3(5)  | 11.1(5)  | 20.8(6)  | 7.9(4)   | 6.0(4)   | 3.6(4)   |
| Se2  | 11.8(2)  | 9.2(2)   | 11.7(2)  | 2.36(16) | 0.21(16) | 2.00(16) |
| Cl21 | 23.0(6)  | 19.5(6)  | 14.5(5)  | 1.8(4)   | 4.6(4)   | 6.9(5)   |
| Cl22 | 12.1(5)  | 20.1(6)  | 19.3(6)  | 3.6(4)   | -3.0(4)  | 0.0(4)   |
| Cl23 | 20.1(6)  | 16.4(5)  | 31.6(7)  | 12.0(5)  | 1.0(5)   | 4.7(5)   |

|      |          |          |          |          |          |          |
|------|----------|----------|----------|----------|----------|----------|
| Se3  | 11.4(2)  | 8.16(19) | 7.48(19) | 1.94(15) | 1.90(15) | 3.32(16) |
| Cl31 | 19.2(5)  | 16.4(5)  | 8.2(5)   | 0.7(4)   | 4.4(4)   | 5.0(4)   |
| Cl32 | 11.6(5)  | 25.0(6)  | 15.8(5)  | 3.3(4)   | -0.2(4)  | 2.9(4)   |
| Cl33 | 27.4(6)  | 11.9(5)  | 22.4(6)  | 9.2(4)   | 3.1(5)   | 6.5(5)   |
| Se4  | 10.4(2)  | 8.02(19) | 8.9(2)   | 1.78(15) | 1.67(16) | 1.07(16) |
| Cl41 | 33.5(7)  | 19.0(6)  | 10.9(5)  | 4.9(4)   | 6.5(5)   | 0.0(5)   |
| Cl42 | 11.0(5)  | 22.6(6)  | 29.1(6)  | 3.3(5)   | -0.4(5)  | -2.5(5)  |
| Cl43 | 20.3(6)  | 13.0(5)  | 18.3(5)  | 0.8(4)   | 2.1(4)   | 8.2(4)   |
| Cl1  | 16.2(5)  | 21.2(6)  | 18.9(6)  | 8.9(4)   | 4.9(4)   | 2.2(4)   |
| S1   | 13.4(5)  | 8.8(5)   | 13.0(5)  | 3.7(4)   | 2.1(4)   | 2.9(4)   |
| O11  | 31(2)    | 9.0(15)  | 23.9(18) | 5.7(14)  | 2.8(15)  | 6.4(14)  |
| O12  | 20.8(18) | 22.9(18) | 11.5(16) | 2.0(13)  | 3.3(13)  | 7.0(14)  |
| O13  | 15.0(16) | 15.4(16) | 21.0(17) | 1.8(13)  | 0.0(13)  | 2.8(13)  |
| Cl2  | 23.5(6)  | 22.5(6)  | 40.6(8)  | 12.6(5)  | 17.9(6)  | 9.7(5)   |
| S2   | 12.6(5)  | 10.8(5)  | 13.1(5)  | 1.1(4)   | 0.4(4)   | 3.3(4)   |
| O21  | 20.1(19) | 47(2)    | 16.6(18) | 1.2(16)  | -4.4(15) | 20.0(18) |
| O22  | 17.8(17) | 9.0(15)  | 39(2)    | 6.1(14)  | 4.5(15)  | 4.7(13)  |
| O23  | 13.6(16) | 12.6(15) | 19.3(17) | -1.0(13) | 1.2(13)  | 5.1(13)  |
| Cl3  | 13.6(5)  | 21.5(6)  | 19.1(6)  | -2.8(4)  | -1.3(4)  | -0.7(4)  |
| S3   | 12.0(5)  | 10.1(5)  | 8.0(5)   | 1.9(4)   | 1.4(4)   | 1.3(4)   |
| O31  | 27.4(19) | 21.2(18) | 9.9(16)  | 5.7(13)  | 4.5(14)  | 6.9(15)  |
| O32  | 25.8(19) | 13.5(16) | 14.5(16) | 4.5(13)  | 2.5(14)  | 3.6(14)  |
| O33  | 13.1(16) | 25.6(18) | 12.3(16) | 6.2(13)  | 4.8(13)  | 2.4(14)  |
| Cl4  | 11.3(5)  | 25.6(6)  | 22.0(6)  | 9.1(5)   | 1.8(4)   | 5.5(5)   |
| S4   | 10.5(5)  | 8.1(5)   | 10.9(5)  | 2.4(4)   | 2.4(4)   | 2.4(4)   |
| O41  | 20.2(17) | 24.2(18) | 10.6(15) | 5.2(13)  | 2.3(13)  | 9.8(14)  |
| O42  | 26.4(18) | 6.4(14)  | 16.9(16) | 4.6(12)  | 6.2(14)  | 3.7(13)  |
| O43  | 13.9(16) | 13.9(16) | 26.8(18) | 10.0(14) | 1.3(14)  | 1.8(13)  |

**Table S15:** Bond Lengths for [SeCl<sub>3</sub>][ClSO<sub>3</sub>].

| Atom | Atom | Length/pm | Atom | Atom | Length/pm |
|------|------|-----------|------|------|-----------|
| Se1  | Cl11 | 214.7(1)  | S1   | O12  | 143.3(3)  |
| Se1  | Cl12 | 212.6(1)  | S1   | O13  | 144.5(3)  |

|     |      |          |     |     |          |
|-----|------|----------|-----|-----|----------|
| Se1 | Cl13 | 213.3(1) | Cl2 | S2  | 203.9(2) |
| Se2 | Cl21 | 213.4(1) | S2  | O21 | 143.8(4) |
| Se2 | Cl22 | 212.9(1) | S2  | O22 | 144.2(3) |
| Se2 | Cl23 | 213.7(1) | S2  | O23 | 145.3(3) |
| Se3 | Cl31 | 212.9(1) | Cl3 | S3  | 205.3(2) |
| Se3 | Cl32 | 212.7(1) | S3  | O31 | 144.0(3) |
| Se3 | Cl33 | 214.0(1) | S3  | O32 | 144.5(3) |
| Se4 | Cl41 | 213.8(1) | S3  | O33 | 144.4(3) |
| Se4 | Cl42 | 212.5(2) | Cl4 | S4  | 205.8(2) |
| Se4 | Cl43 | 213.9(1) | S4  | O41 | 143.6(3) |
| Cl1 | S1   | 204.3(2) | S4  | O42 | 143.9(3) |
| S1  | O11  | 144.0(3) | S4  | O43 | 144.4(3) |

**Table S16:** Bond Angles for [SeCl<sub>3</sub>][ClSO<sub>3</sub>].

| Atom | Atom | Atom | Angle/°  | Atom | Atom | Atom | Angle/°  |
|------|------|------|----------|------|------|------|----------|
| Cl12 | Se1  | Cl11 | 97.60(5) | O21  | S2   | Cl2  | 103.9(2) |
| Cl12 | Se1  | Cl13 | 96.44(4) | O21  | S2   | O22  | 115.0(2) |
| Cl13 | Se1  | Cl11 | 95.93(5) | O21  | S2   | O23  | 114.1(2) |
| Cl21 | Se2  | Cl23 | 98.61(5) | O22  | S2   | Cl2  | 103.8(2) |
| Cl22 | Se2  | Cl21 | 96.69(5) | O22  | S2   | O23  | 113.4(2) |
| Cl22 | Se2  | Cl23 | 96.34(5) | O23  | S2   | Cl2  | 105.0(2) |
| Cl31 | Se3  | Cl33 | 96.74(5) | O31  | S3   | Cl3  | 104.1(2) |
| Cl32 | Se3  | Cl31 | 98.42(5) | O31  | S3   | O32  | 115.2(2) |
| Cl32 | Se3  | Cl33 | 97.61(5) | O31  | S3   | O33  | 113.8(2) |
| Cl41 | Se4  | Cl43 | 97.95(5) | O32  | S3   | Cl3  | 104.3(2) |
| Cl42 | Se4  | Cl41 | 97.63(5) | O33  | S3   | Cl3  | 102.9(2) |
| Cl42 | Se4  | Cl43 | 97.44(5) | O33  | S3   | O32  | 114.6(2) |
| O11  | S1   | Cl1  | 103.1(2) | O41  | S4   | Cl4  | 104.3(1) |
| O11  | S1   | O13  | 113.5(2) | O41  | S4   | O42  | 114.5(2) |
| O12  | S1   | Cl1  | 104.0(2) | O41  | S4   | O43  | 115.4(2) |
| O12  | S1   | O11  | 115.2(2) | O42  | S4   | Cl4  | 104.0(2) |
| O12  | S1   | O13  | 114.9(2) | O42  | S4   | O43  | 113.9(2) |

**[Se<sub>2</sub>I<sub>4</sub>]<sub>2</sub>[S<sub>4</sub>O<sub>13</sub>]<sub>2</sub>·(SO<sub>3</sub>) (3)****Table S17:** Crystallographic data of [Se<sub>2</sub>I<sub>4</sub>]<sub>2</sub>[S<sub>4</sub>O<sub>13</sub>]<sub>2</sub>·(SO<sub>3</sub>).

|                                                              |                                                                                            |
|--------------------------------------------------------------|--------------------------------------------------------------------------------------------|
| Empirical formula                                            | I <sub>8</sub> O <sub>29</sub> S <sub>9</sub> Se <sub>4</sub>                              |
| Formula weight                                               | 2083.58 g/mol                                                                              |
| Temperature                                                  | 100.00 K                                                                                   |
| Crystal system                                               | Triclinic                                                                                  |
| Space group                                                  | <i>P</i> $\bar{1}$ (No. 2)                                                                 |
| Unit cell dimensions                                         | <i>a</i> = 993.8(1) pm                                                                     |
|                                                              | <i>b</i> = 1013.7(1) pm                                                                    |
|                                                              | <i>c</i> = 1045.9(2) pm                                                                    |
|                                                              | $\alpha$ = 102.280(5) $^\circ$                                                             |
|                                                              | $\beta$ = 97.127(5) $^\circ$                                                               |
| Volume                                                       | $\gamma$ = 94.689(2) $^\circ$                                                              |
|                                                              | 1015.2(2) Å <sup>3</sup>                                                                   |
|                                                              | <i>Z</i>                                                                                   |
| $\rho_{\text{calc}}$                                         | 3.408 g/cm <sup>3</sup>                                                                    |
| $\mu$                                                        | 10.245 mm <sup>-1</sup>                                                                    |
| F(000)                                                       | 936                                                                                        |
| Crystal size                                                 | 0.08 × 0.07 × 0.01 mm <sup>3</sup>                                                         |
| Radiation                                                    | MoK $\alpha$ ( $\lambda$ = 0.71073 nm)                                                     |
| 2 $\theta$ range for data collection                         | 4.028 to 57.424                                                                            |
| Index ranges                                                 | -13 ≤ <i>h</i> ≤ 13, -13 ≤ <i>k</i> ≤ 13, -14 ≤ <i>l</i> ≤ 14                              |
| Reflections collected                                        | 35166                                                                                      |
| Independent reflections                                      | 5257 [ <i>R</i> <sub>int</sub> = 0.0411, <i>R</i> <sub><math>\sigma</math></sub> = 0.0263] |
| Completeness                                                 | 99.7%                                                                                      |
| Absorption correction                                        | Multiscan                                                                                  |
| Min. and max. transmission                                   | 0.486 / 0.746                                                                              |
| Data/restraints/parameters                                   | 5257/0/244                                                                                 |
| Goodness-of-fit on F <sup>2</sup>                            | 1.114                                                                                      |
| Final <i>R</i> indexes [ <i>I</i> ≥ 2 $\sigma$ ( <i>I</i> )] | <i>R</i> <sub>1</sub> = 0.0387, <i>wR</i> <sub>2</sub> = 0.0790                            |
| Final <i>R</i> indexes [all data]                            | <i>R</i> <sub>1</sub> = 0.0465, <i>wR</i> <sub>2</sub> = 0.0829                            |
| Largest diff. peak/hole                                      | 1.53/−1.20 e · Å <sup>-3</sup>                                                             |
| CCDC-No.                                                     | 2492707                                                                                    |

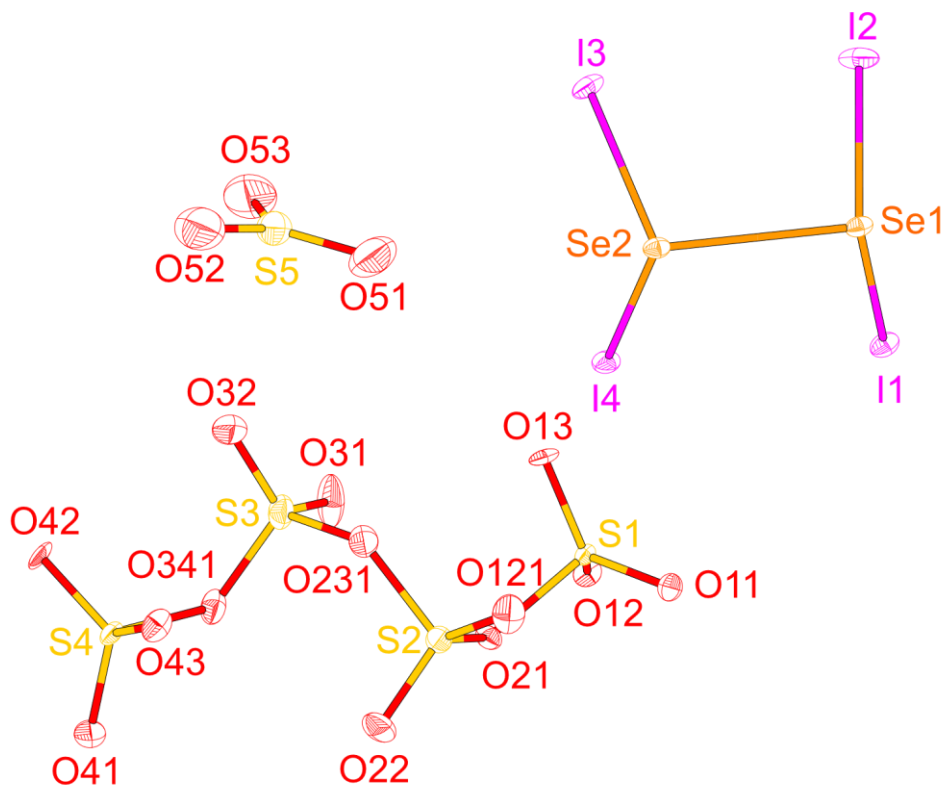

**Figure S6:** Thermal ellipsoid plot of the asymmetric unit  $[\text{Se}_2\text{I}_4]_2[\text{S}_4\text{O}_{13}]_2 \cdot (\text{SO}_3)$  shown with 50% probability.

**Table S18:** Fractional Atomic Coordinates ( $\times 10^4$ ) and Equivalent Isotropic Displacement Parameters ( $\text{\AA}^2 \times 10^3$ ) for  $[\text{Se}_2\text{I}_4]_2[\text{S}_4\text{O}_{13}]_2 \cdot (\text{SO}_3)$ .  $U_{\text{eq}}$  is defined as 1/3 of the trace of the orthogonalised  $U_{\text{ij}}$  tensor.

| Atom | <i>x</i>   | <i>y</i>   | <i>z</i>   | $U_{\text{eq}}$ |
|------|------------|------------|------------|-----------------|
| I1   | 4597.0(4)  | 6755.1(4)  | 11363.4(4) | 12.69(9)        |
| I2   | 1959.3(5)  | 9377.4(5)  | 11561.1(5) | 19.20(11)       |
| I3   | 2103.7(4)  | 9593.0(4)  | 8136.5(5)  | 14.79(10)       |
| I4   | 4827.8(4)  | 7209.6(4)  | 7966.0(4)  | 13.4(1)         |
| Se1  | 2180.0(6)  | 6972.9(6)  | 10573.4(7) | 10.56(13)       |
| Se2  | 2339.4(6)  | 7162.6(6)  | 8041.2(6)  | 10.12(13)       |
| S1   | 8460.4(15) | 6771.9(15) | 8331.3(15) | 8.0(3)          |
| S2   | 7750.4(17) | 5297.4(16) | 5615.8(16) | 13.5(3)         |
| S3   | 8138(2)    | 7814.6(18) | 4721.6(17) | 18.9(3)         |
| S4   | 8453.3(16) | 6523.8(15) | 2012.4(16) | 10.7(3)         |
| O11  | 7862(5)    | 5703(5)    | 8843(5)    | 13.4(9)         |
| O12  | 9802(5)    | 7392(5)    | 8933(5)    | 12.7(9)         |
| O13  | 7534(4)    | 7716(4)    | 7986(5)    | 11.3(9)         |

|      |          |           |          |          |
|------|----------|-----------|----------|----------|
| O21  | 6562(6)  | 4744(5)   | 6018(5)  | 22.0(11) |
| O22  | 8431(6)  | 4543(6)   | 4658(5)  | 23.0(11) |
| O31  | 9042(7)  | 8493(6)   | 5872(5)  | 29.4(14) |
| O32  | 7134(7)  | 8495(6)   | 4113(6)  | 28.4(13) |
| O41  | 9573(5)  | 5797(5)   | 1672(5)  | 20.4(11) |
| O42  | 8328(6)  | 7765(5)   | 1589(5)  | 18.6(10) |
| O43  | 7183(5)  | 5697(5)   | 1961(5)  | 16.0(10) |
| O121 | 8856(5)  | 5977(5)   | 6812(5)  | 12.2(9)  |
| O231 | 7218(5)  | 6583(5)   | 5060(5)  | 17.4(10) |
| O341 | 9015(5)  | 7103(5)   | 3726(5)  | 17.5(10) |
| S5   | 5326(4)  | 10244(4)  | 5041(5)  | 25.5(9)  |
| O51  | 5040(30) | 9420(20)  | 5910(30) | 51(7)    |
| O52  | 4690(30) | 9960(20)  | 3800(20) | 56(7)    |
| O53  | 6264(18) | 11410(14) | 5445(16) | 49(4)    |

**Table S19:** Anisotropic Displacement Parameters ( $\text{\AA}^2 \times 10^3$ ) for  $[\text{Se}_2\text{I}_4]_2[\text{S}_4\text{O}_{13}]_2 \cdot (\text{SO}_3)$ . The anisotropic displacement factor exponent takes the form:  $-2\pi^2[h^2a^*U_{11}+2hka^*b^*U_{12}+\dots]$ .

| Atom | $U_{11}$  | $U_{22}$  | $U_{33}$ | $U_{23}$  | $U_{13}$  | $U_{12}$ |
|------|-----------|-----------|----------|-----------|-----------|----------|
| I1   | 9.57(18)  | 12.04(19) | 16.9(2)  | 5.18(16)  | -0.16(15) | 1.79(14) |
| I2   | 19.2(2)   | 14.4(2)   | 20.3(2)  | -3.54(17) | -3.23(17) | 8.98(17) |
| I3   | 11.51(19) | 11.05(19) | 25.0(2)  | 9.95(17)  | 3.26(16)  | 3.08(14) |
| I4   | 9.62(18)  | 13.46(19) | 20.2(2)  | 7.19(16)  | 6.18(15)  | 4.29(14) |
| Se1  | 7.8(3)    | 8.6(3)    | 15.8(3)  | 3.7(2)    | 1.7(2)    | 1.7(2)   |
| Se2  | 7.0(3)    | 8.9(3)    | 14.7(3)  | 2.8(2)    | 1.7(2)    | 1.3(2)   |
| S1   | 7.2(6)    | 7.8(6)    | 9.5(7)   | 3.7(5)    | 0.9(5)    | 0.7(5)   |
| S2   | 16.9(7)   | 11.6(7)   | 11.2(7)  | 1.5(6)    | 1.1(6)    | 1.7(6)   |
| S3   | 29.7(9)   | 16.0(8)   | 10.9(8)  | 3.7(6)    | 2.0(7)    | 1.4(7)   |
| S4   | 11.8(7)   | 9.2(7)    | 12.8(7)  | 6.1(6)    | 1.8(6)    | 2.0(5)   |
| O11  | 15(2)     | 12(2)     | 15(2)    | 5.4(18)   | 4.7(18)   | 0.8(17)  |
| O12  | 10(2)     | 12(2)     | 15(2)    | 3.6(18)   | -0.2(17)  | -0.2(17) |
| O13  | 10(2)     | 7(2)      | 18(2)    | 4.3(17)   | 1.0(17)   | 4.5(16)  |
| O21  | 29(3)     | 16(2)     | 18(3)    | 2(2)      | 1(2)      | -5(2)    |
| O22  | 32(3)     | 23(3)     | 13(2)    | -2(2)     | 5(2)      | 11(2)    |

|      |        |        |          |         |         |          |
|------|--------|--------|----------|---------|---------|----------|
| O31  | 48(4)  | 24(3)  | 11(3)    | 2(2)    | 0(2)    | -16(3)   |
| O32  | 45(4)  | 23(3)  | 22(3)    | 6(2)    | 10(3)   | 17(3)    |
| O41  | 20(3)  | 24(3)  | 20(3)    | 8(2)    | 6(2)    | 11(2)    |
| O42  | 36(3)  | 9(2)   | 15(2)    | 9.0(19) | 5(2)    | 8(2)     |
| O43  | 12(2)  | 15(2)  | 21(3)    | 8(2)    | 0.1(19) | -2.7(18) |
| O121 | 11(2)  | 14(2)  | 12(2)    | 1.8(18) | 3.4(17) | 3.1(17)  |
| O231 | 17(2)  | 20(2)  | 16(2)    | 5(2)    | 3.0(19) | 2.4(19)  |
| O341 | 15(2)  | 24(3)  | 15(2)    | 10(2)   | 0.9(19) | 1.7(19)  |
| S5   | 31(3)  | 27(3)  | 18.8(18) | 4.5(19) | 2(2)    | 10.3(18) |
| O51  | 53(12) | 46(12) | 76(19)   | 41(13)  | 33(13)  | 26(11)   |
| O52  | 70(16) | 69(16) | 30(9)    | 9(12)   | 2(9)    | 42(15)   |
| O53  | 73(11) | 23(7)  | 51(9)    | 1(6)    | 18(8)   | 7(7)     |

**Table S20:** Bond Lengths for  $[\text{Se}_2\text{I}_4]_2[\text{S}_4\text{O}_{13}]_2 \cdot (\text{SO}_3)$ .

| Atom | Atom | Length/pm | Atom | Atom | Length/pm |
|------|------|-----------|------|------|-----------|
| I1   | Se1  | 248.46(8) | S2   | O231 | 163.6(5)  |
| I2   | Se1  | 247.56(8) | S3   | O31  | 141.6(6)  |
| I3   | Se2  | 247.59(8) | S3   | O32  | 142.0(6)  |
| I4   | Se2  | 248.09(8) | S3   | O231 | 161.2(5)  |
| Se1  | Se2  | 271.9(1)  | S3   | O341 | 154.0(5)  |
| S1   | O11  | 142.6(5)  | S4   | O41  | 142.4(5)  |
| S1   | O12  | 143.3(5)  | S4   | O42  | 143.0(5)  |
| S1   | O13  | 145.0(4)  | S4   | O43  | 144.6(5)  |
| S1   | O121 | 173.0(5)  | S4   | O341 | 176.7(5)  |
| S2   | O21  | 141.5(6)  | S5   | O51  | 140(2)    |
| S2   | O22  | 140.5(5)  | S5   | O52  | 133(3)    |
| S2   | O121 | 155.4(5)  | S5   | O53  | 139.8(2)  |

**Table S21:** Bond Angles for  $[\text{Se}_2\text{I}_4]_2[\text{S}_4\text{O}_{13}]_2 \cdot (\text{SO}_3)$ .

| Atom | Atom | Atom | Angle/°   | Atom | Atom | Atom | Angle/°  |
|------|------|------|-----------|------|------|------|----------|
| I1   | Se1  | Se2  | 100.84(3) | O31  | S3   | O32  | 121.3(4) |
| I2   | Se1  | I1   | 102.76(3) | O31  | S3   | O231 | 109.0(3) |
| I2   | Se1  | Se2  | 99.34(3)  | O31  | S3   | O341 | 107.0(4) |

|      |     |      |           |      |      |      |          |
|------|-----|------|-----------|------|------|------|----------|
| I3   | Se2 | I4   | 98.99(3)  | O32  | S3   | O231 | 101.9(3) |
| I3   | Se2 | Se1  | 102.43(3) | O32  | S3   | O341 | 111.9(3) |
| I4   | Se2 | Se1  | 102.10(3) | O341 | S3   | O231 | 104.2(3) |
| O11  | S1  | O12  | 117.9(3)  | O41  | S4   | O42  | 117.8(3) |
| O11  | S1  | O13  | 115.0(3)  | O41  | S4   | O43  | 115.6(3) |
| O11  | S1  | O121 | 104.9(3)  | O41  | S4   | O341 | 98.4(3)  |
| O12  | S1  | O13  | 114.4(3)  | O42  | S4   | O43  | 115.4(3) |
| O12  | S1  | O121 | 98.4(3)   | O42  | S4   | O341 | 102.4(3) |
| O13  | S1  | O121 | 102.7(3)  | O43  | S4   | O341 | 103.2(3) |
| O21  | S2  | O121 | 112.1(3)  | S2   | O121 | S1   | 122.9(3) |
| O21  | S2  | O231 | 102.3(3)  | S3   | O231 | S2   | 127.4(3) |
| O22  | S2  | O21  | 122.5(3)  | S3   | O341 | S4   | 124.2(3) |
| O22  | S2  | O121 | 106.6(3)  | O51  | S5   | O53  | 121.3(1) |
| O22  | S2  | O231 | 108.1(3)  | O52  | S5   | O51  | 121.4(1) |
| O121 | S2  | O231 | 103.6(3)  | O52  | S5   | O53  | 117.3(1) |

**Table S22:** Torsion Angles for [Se<sub>2</sub>I<sub>4</sub>]<sub>2</sub>[S<sub>4</sub>O<sub>13</sub>]<sub>2</sub>'(SO<sub>3</sub>).

| A   | B  | C    | D  | Angle/°   | A    | B  | C    | D  | Angle/°   |
|-----|----|------|----|-----------|------|----|------|----|-----------|
| O11 | S1 | O121 | S2 | 67.8(4)   | O32  | S3 | O231 | S2 | 172.0(4)  |
| O12 | S1 | O121 | S2 | -170.3(3) | O32  | S3 | O341 | S4 | -26.7(5)  |
| O13 | S1 | O121 | S2 | -52.8(4)  | O41  | S4 | O341 | S3 | -171.3(4) |
| O21 | S2 | O121 | S1 | -32.2(4)  | O42  | S4 | O341 | S3 | 67.7(4)   |
| O21 | S2 | O231 | S3 | 166.8(4)  | O43  | S4 | O341 | S3 | -52.5(4)  |
| O22 | S2 | O121 | S1 | -168.8(3) | O121 | S2 | O231 | S3 | 50.1(4)   |
| O22 | S2 | O231 | S3 | -62.7(5)  | O231 | S2 | O121 | S1 | 77.3(4)   |
| O31 | S3 | O231 | S2 | -58.5(5)  | O231 | S3 | O341 | S4 | 82.7(4)   |
| O31 | S3 | O341 | S4 | -161.9(4) | O341 | S3 | O231 | S2 | 55.4(5)   |

**Table S23:** Atomic Occupancy for [Se<sub>2</sub>I<sub>4</sub>]<sub>2</sub>[S<sub>4</sub>O<sub>13</sub>]<sub>2</sub>'(SO<sub>3</sub>).

| Atom | Occupancy | Atom | Occupancy | Atom | Occupancy |
|------|-----------|------|-----------|------|-----------|
| S5   | 0.5       | O52  | 0.5       | O51  | 0.5       |
| O53  | 0.5       |      |           |      |           |

**Table S 24:** S–O bond lengths (in pm) and  $\delta$ -values (terminal  $\text{SO}_3$ ) groups of literature-known tetrasulfate compounds.  $[\text{TS}] = [\text{S}_4\text{O}_{13}]^{2-}$ .

| Bond         | $[\text{Se}_2\text{I}_4]_2$<br>[TS] <sub>2</sub> (SO <sub>3</sub> ) | [Te <sub>6</sub> ]<br>[TS] <sub>2</sub> <sup>[10]</sup> | [I <sub>3</sub> ] <sub>4</sub><br>[TS] <sub>2</sub> (SO <sub>3</sub> ) <sup>[11]</sup> | Ba<br>[TS] <sup>b</sup> <sup>[12]</sup> | [NO <sub>2</sub> ] <sub>2</sub><br>[TS] <sup>a</sup> <sup>[13]</sup> | Li <sub>2</sub><br>[TS] <sup>[11]</sup> |
|--------------|---------------------------------------------------------------------|---------------------------------------------------------|----------------------------------------------------------------------------------------|-----------------------------------------|----------------------------------------------------------------------|-----------------------------------------|
| S1–O11       | 142.6(5)                                                            | 142.4(5)                                                | 142.8(9)–144(1)                                                                        | 142.6(8)                                | 142.0                                                                | 143.1(2)                                |
| S1–O12       | 143.3(5)                                                            | 142.8(5)                                                | 143(1)–144.3(9)                                                                        | 142.7(8)                                | 142.3                                                                | 142.5(2)                                |
| S1–O13       | 145.0(4)                                                            | 143.2(5)                                                | 143(1)–145(1)                                                                          | 142.6(8)                                | 142.3                                                                | 142.4(2)                                |
| $\delta(S1)$ | 10.64                                                               | 10.33                                                   | 10.52                                                                                  | 9.20                                    | 9.80                                                                 | 9.57                                    |
| S1–O121      | 173.0(5)                                                            | 176.4(5)                                                | 171.2(9)–174.0(9)                                                                      | 178.7(8)                                | 176.6                                                                | 176.5(2)                                |
| S2–O21       | 141.5(6)                                                            | 140.7(5)                                                | 140(1)–141.2(9)                                                                        | 141.9(8)                                | 141.4                                                                | 140.9(2)                                |
| S2–O22       | 140.5(5)                                                            | 142.3(4)                                                | 141(1)–141(1)                                                                          | 142.0(8)                                | 141.1                                                                | 141.0(2)                                |
| S2–O121      | 155.4(5)                                                            | 154.1(5)                                                | 155.6(9)–155.7(9)                                                                      | 152.4(8)                                | 153.0                                                                | 152.4(2)                                |
| S2–O231      | 163.6(5)                                                            | 160.9(5)                                                | 162(1)–163.3(9)                                                                        | 161.8(5)                                | 163.9                                                                | 162.8(2)                                |
| S3–O31       | 141.6(6)                                                            | 141.9(5)                                                | 141(1)–141.5(9)                                                                        | 141.9(8)                                | 141.3                                                                | 141.7(2)                                |
| S3–O32       | 142.0(6)                                                            | 141.3(5)                                                | 140(1)–144(1)                                                                          | 142.0(8)                                | 142.0                                                                | 140.9(2)                                |
| S3–O231      | 161.2(5)                                                            | 163.9(5)                                                | 161.3(9)–162.8(9)                                                                      | 161.8(5)                                | 160.9                                                                | 161.7(2)                                |
| S3–O341      | 154.0(5)                                                            | 152.7(5)                                                | 155.5(9)–156.7(9)                                                                      | 152.4(8)                                | 153.4                                                                | 153.2(2)                                |
| S4–O41       | 142.4(5)                                                            | 142.1(5)                                                | 142.4(9)–143.9(8)                                                                      | 142.6(8)                                | 142.1                                                                | 142.1(2)                                |
| S4–O42       | 143.0(5)                                                            | 142.1(5)                                                | 142.9(9)–146(1)                                                                        | 142.7(8)                                | 143.1                                                                | 141.8(2)                                |
| S4–O43       | 144.6(5)                                                            | 143.5(5)                                                | 142.4(9)–144.0(8)                                                                      | 142.6(8)                                | 143.1                                                                | 142.1(2)                                |
| $\delta(S4)$ | 9.99                                                                | 9.87                                                    | 10.50                                                                                  | 9.20                                    | 9.52                                                                 | 9.85                                    |
| S4–O341      | 176.7(5)                                                            | 175.6(5)                                                | 172.3(9)–174.7(8)                                                                      | 178.7(8)                                | 177.0                                                                | 175.3(2)                                |

*a* – the average lengths were calculated, *b* – symmetry plane through the anion leads to  $S3 = S2$  and  $S4 = S1$ .

## C. Delta Values

The delta values (in the following written as  $\delta$ ) were calculated using the *Polynator* software package, as we have described before.<sup>[14]</sup> Therein,  $\delta$  is calculated as follows:

$$\delta = 100 \left( \frac{\sum_i |\mathbf{a}_i - \mathbf{v}_i|^2}{\sum_i |\mathbf{a}_i - \mathbf{c}|^2} \right)^{1/2} \quad (1.0)$$

where  $\mathbf{a}_i$  is an atom vector,  $\mathbf{v}_i$  is the vector the corresponding model vertex and  $\mathbf{c}$  is the centroid of all atom vectors.<sup>[15]</sup>

The *.cif* files from the analyzed substances were taken from the ICSD/CCDC websites and used without further modification. Within the software, the central and ligand atoms were defined as sulfur and oxygen, respectively. The terminal  $\text{SO}_3$  units could be identified in most cases by adjusting the distance connectivity criterium to a maximum value of 1.6 Å. For the analysis, the generated  $\delta$  values for the geometric object ‘triangle[regular] (-6m2, 1 °f) were taken. If ‘tripod[3m] (2 °f)’ would be chosen as the geometric object, the correction of the central atoms’ distortion would lead to values not suitable for comparison.

## D. Computational Details

To ensure the theoretical models accurately reflect the experimental data, the calculations were performed on molecular clusters derived directly from the X-ray diffraction crystal structures.

All density functional theory (DFT) calculations were performed using the TURBOMOLE 7.7 program package<sup>[16]</sup> and the X-ray coordinates. The PBE0 hybrid functional<sup>[17]</sup> with the D4 dispersion correction<sup>[18]</sup> was employed, in conjunction with the def2-TZVP basis set.<sup>[19]</sup> For iodine atoms, effective core potentials (ECPs) including scalar relativistic effects were utilized to account for relativistic contributions.<sup>[20]</sup>

To analyze the nature of noncovalent interactions, the quantum theory of atoms in molecules (QTAIM) analysis<sup>[21-22]</sup> was performed using the Multiwfn program.<sup>[23]</sup> The topological parameters, including bond critical points (BCPs) and electron density values, were extracted to characterize halogen and chalcogen bonding interactions. The chalcogen bond interaction energies were obtained through an energy descriptor ( $E_{\text{int}} = 0.375 V(r)$ ) based on the potential energy density ( $V$ ) found in a bond Critical Point (bcp) interconnecting the chalcogen atom with the Lewis base.<sup>[24]</sup>

Natural Bond Orbital (NBO) analysis<sup>[25]</sup> was conducted using the NBO 7.0 program<sup>[26]</sup> to investigate orbital donor-acceptor interactions and quantify stabilization energies associated with  $\text{LP}(\text{O}) \rightarrow \sigma^*$  charge transfer. The second-order perturbation energies provided insights into the electronic contributions to halogen bonding interactions.

## Additional Results and Discussion

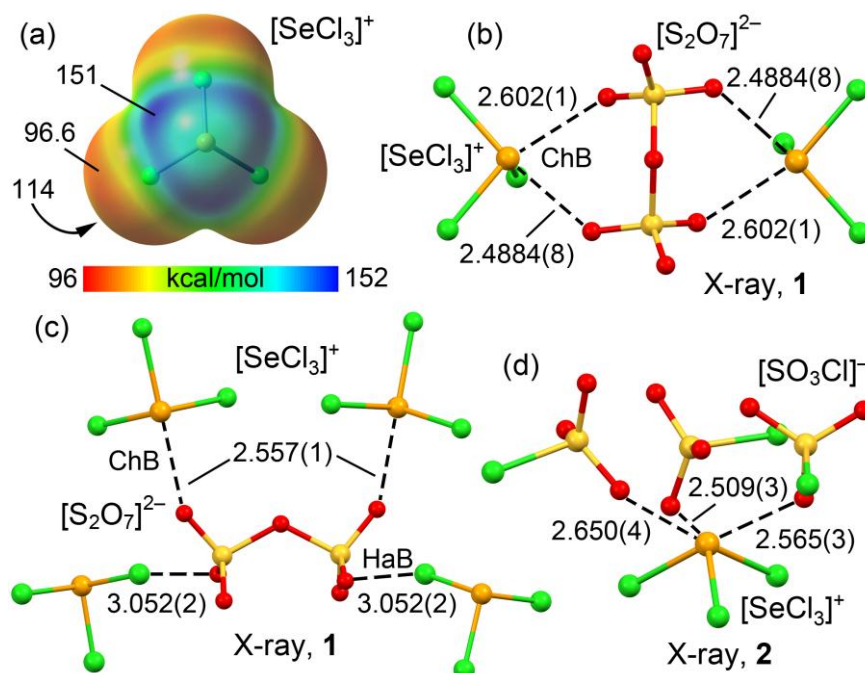

**Figure S 7:** (a) MEP surface of the  $[\text{SeCl}_3]^+$  cation (isosurface 0.001 a.u.) with energies at selected points in kcal/mol. (b,c) Partial views of the X-ray structure of salt **1** showing the chalcogen bonding assemblies. (d) Partial view of the X-ray structure of salt **2**. Distances in [Å].

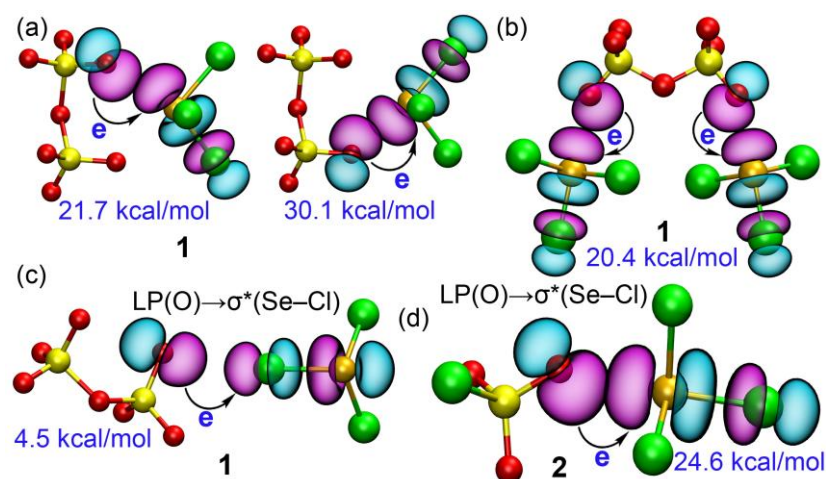

**Figure S 8:** NBO analysis of the chalcogen and halogen bonded dimers in compounds 1 and 2. The donor-acceptor interactions ( $LP \rightarrow \sigma^*$ ) and the associated second-order perturbation energies  $E^{(2)}$  in kcal/mol are indicated.

The magnitude of the perturbation energies is attributed to the short intermolecular distances, which facilitate strong orbital overlap. It is worth noting that while these  $E^{(2)}$  values are significantly larger than the total interaction energies discussed previously, they are not directly comparable; the orbital stabilization is largely compensated by the steric exchange-repulsion term arising from the close proximity of the interacting units. In the case of the halogen bond, a similar  $LP(O) \rightarrow \sigma^*(Cl-Se)$  electron transfer mechanism is observed. However, due to the much longer  $Cl \cdots O$  distance compared to the  $Se \cdots O$  contacts, the orbital overlap is less effective, resulting in a more modest  $E^{(2)}$  energy of 4.5 kcal/mol.

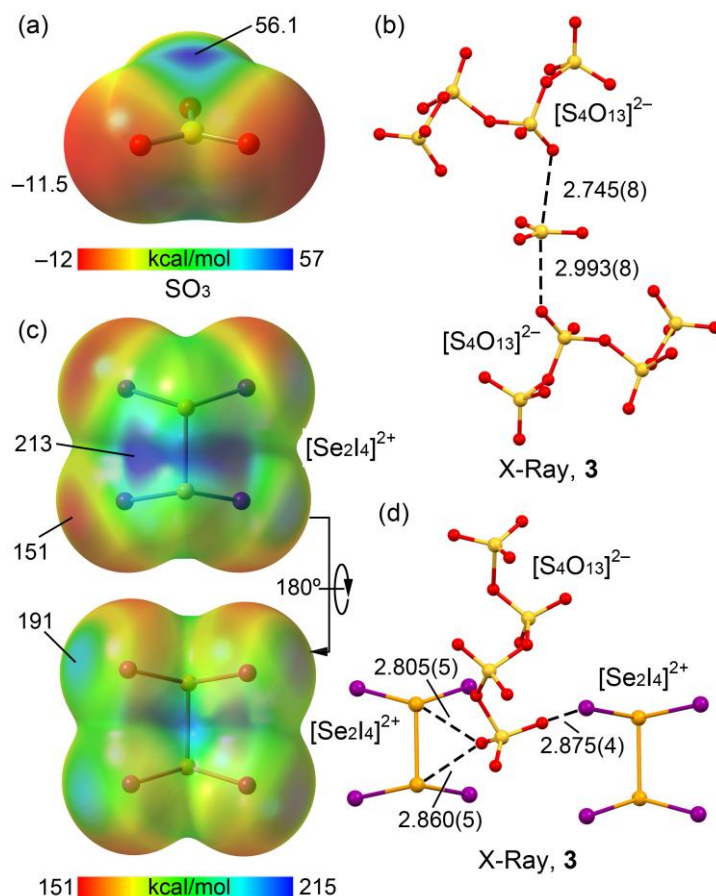

**Figure S 9:** (a) MEP surface of the  $\text{SO}_3$  molecule (isosurface 0.001 a.u.) with energies at selected points in kcal/mol. (b) Partial view of the X-ray structure of **3** showing the  $\pi$ -hole interactions of the  $\text{SO}_3$  molecule. (c) Two views of the MEP surface of the  $[\text{Se}_2\text{I}_4]^{2+}$  dication (isosurface 0.001 a.u.) showing the merged  $\sigma$ -holes. (d) Partial view of the X-ray structure of **3** showing the competition between ChB and HaB interactions.

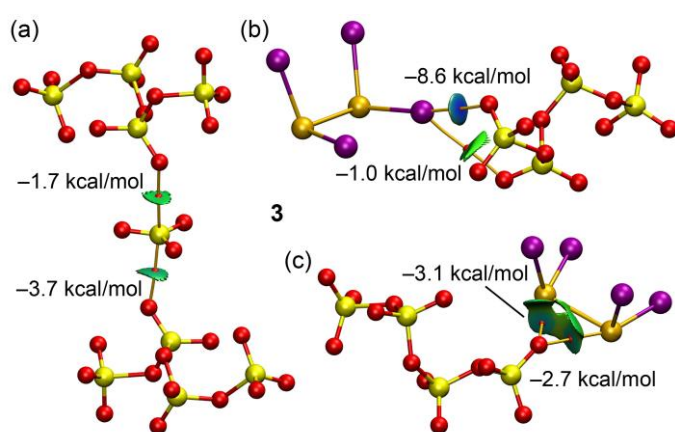

**Figure S 10:** QTAIM/NCIplot analysis of the non-covalent assemblies in compound **3**. (a)  $\pi$ -hole interactions involving  $\text{SO}_3$  and two anions. (b) Halogen bonding interactions between  $[\text{Se}_2\text{I}_4]^{2+}$  and the anion. (c) Bifurcated chalcogen bonding interactions between  $[\text{Se}_2\text{I}_4]^{2+}$  and the anion. The interaction energies in kcal/mol are indicated.

## References

- [1] G. Brauer, *Handbuch der Präparativen Anorganischen Chemie*, 3 ed., Ferdinand Enke Verlag, Stuttgart, **1975**.
- [2] R. King, S. Sangokoya, *Inorg. Chem.* **1987**, *26*, 2727-2730.
- [3] Bruker AXS, *APEX 5 v2023.9-2* **2023**, Madsion, Winconsin, USA.
- [4] SmartLabStudioII, *Rigaku Corporation* **2014**, Version 4.4.295.290.
- [5] L. Krause, R. Herbst-Irmer, G. M. Sheldrick, D. Stalke, *J. Appl. Crystallogr.* **2015**, *48*, 3-10.
- [6] O. V. Dolomanov, L. J. Bourhis, R. J. Gildea, J. A. K. Howard, H. Puschmann, *J. Appl. Crystallogr.* **2009**, *42*, 339-341.
- [7] G. Sheldrick, *Acta Crystallogr. A* **2015**, *71*, 3-8.
- [8] G. Sheldrick, *Acta Crystallogr. C* **2015**, *71*, 3-8.
- [9] Crystal Impact GbR, *Diamond 4.6.8* **2022**, Bonn, Germany.
- [10] J. Langwald, S. Burguera, A. Frontera, M. S. Wickleder, *Dalton Trans.* **2026**, *in press*.
- [11] J. Langwald, R. M. Gomila, D. van Gerven, A. Frontera, M. S. Wickleder, *Chem. Sci.* **2025**.
- [12] J. Bruns, C. Kolb, M. S. Wickleder, *Z. Anorg. Allg. Chem.* **2014**, *640*, 2345.
- [13] C. Logemann, T. Klüner, M. S. Wickleder, *Angew. Chem. Int. Ed.* **2012**, *51*, 4997-5000.
- [14] J. Langwald, R. M. Gomila, D. van Gerven, A. Frontera, M. S. Wickleder, *Dalton Trans.* **2025**, *54*, 16095-16105.
- [15] L. Link, R. Niewa, *J. Appl. Crystallogr.* **2023**, *56*, 1855-1864.
- [16] S. G. Balasubramani, G. P. Chen, S. Coriani, M. Diedenhofen, M. S. Frank, Y. J. Franzke, F. Furche, R. Grotjahn, M. E. Harding, C. Hättig, A. Hellweg, B. Helmich-Paris, C. Holzer, U. Huniar, M. Kaupp, A. Marefat Khah, S. Karbalaee Khani, T. Müller, F. Mack, B. D. Nguyen, S. M. Parker, E. Perlt, D. Rappoport, K. Reiter, S. Roy, M. Rückert, G. Schmitz, M. Sierka, E. Tapavicza, D. P. Tew, C. van Wüllen, V. K. Vooora, F. Weigend, A. Wodyński, J. M. Yu, *J. Chem. Phys.* **2020**, *152*.
- [17] C. Adamo, V. Barone, *J. Chem. Phys.* **1999**, *110*, 6158-6170.
- [18] S. Grimme, S. Ehrlich, L. Goerigk, *J. Comput. Chem.* **2011**, *32*, 1456-1465.
- [19] F. Weigend, R. Ahlrichs, *Phys. Chem. Chem. Phys.* **2005**, *7*, 3297-3305.
- [20] K. A. Peterson, D. Figgen, M. Dolg, H. Stoll, *J. Chem. Phys.* **2007**, *126*.
- [21] R. F. W. Bader, *Acc. Chem. Res.* **1985**, *18*, 9-15.
- [22] E. R. Johnson, S. Keinan, P. Mori-Sánchez, J. Contreras-García, A. J. Cohen, W. Yang, *J. Am. Chem. Soc.* **2010**, *132*, 6498-6506.
- [23] T. Lu, F. Chen, *J. Comput. Chem.* **2012**, *33*, 580-592.
- [24] A. Bauzá, A. Frontera, *ChemPhysChem* **2020**, *21*, 26-31.
- [25] A. E. Reed, R. B. Weinstock, F. Weinhold, *J. Chem. Phys.* **1985**, *83*, 735-746.
- [26] E. D. Glendening, C. R. Landis, F. Weinhold, *J. Comput. Chem.* **2019**, *40*, 2234-2241.
